# Supplementary material for: Synthetic strategies to epoxydiynes and a key synthon of the neocarzinostatin chromophore
Source: Royal Society of Chemistry journal article supplement (doi:10.1039/b711196g), 2007-01-01
Supplement: b711196g.pdf [file b711196g.pdf]

### Supporting Information

**[3-(2,2-Dimethyl-[1,3]dioxolane-4-yl)-hex-3-ene-1,5-diynyl]trimethylsilane (3):** To a solution of **2** (47 mg, 0.2 mmol) in DCM (1 mL) was added Et<sub>3</sub>N (74 µL, 0.5 mmol) and DMAP (86 mg, 0.7 mmol) at 0 °C and the reaction was stirred for 30 min. Methanesulfonyl chloride (21 µL, 0.3 mmol) was then added. Stirring was continued for 1.5 h at rt and the reaction quenched with a saturated aqueous solution of NaHCO<sub>3</sub> (2 mL). The resulting mixture extracted with DCM (3 x 2 mL), washed with brine (6 mL), dried over magnesium sulphate, filtered and concentrated *in vacuo*. Column chromatography eluting with Et<sub>2</sub>O (7%)/PE afforded the inseparable diastereoisomeric enediynes **3** (17 mg, *E:Z* 5:3, 38%) as a clear yellow oil.  $\nu_{\max}$  (film)/cm<sup>-1</sup> 3299, 3054, 2305, 1265; <sup>1</sup>H NMR (300 MHz, CDCl<sub>3</sub>)  $\delta_{\text{H}}$  6.15 (d, 1H, *J* 2.5, **minor**), 5.98 (d, 1H, *J* 2.5, **major**), 5.43 (t, 1H, *J* 7.0, **major**), 4.40 (t, 1H, *J* 7.0, **minor**), 4.10-3.91 (m, 2H), 3.09 (d, 1H, *J* 2.5, **minor**), 3.00 (d, 1H, *J* 2.5, **major**), 1.68 (s, 3H, **major**), 1.46 (s, 3H, **major**), 1.45 (s, 3H, **minor**), 1.35 (s, 3H, **minor**), 0.28 (s, 9H); <sup>13</sup>C (75MHz, CDCl<sub>3</sub>)  $\delta_{\text{C}}$  137.3 (C, **major**), 136.1 (C, **minor**), 126.4 (C, **minor**), 118.1 (CH, **major**), 115.8 (CH, **minor**), 110.8 (C, **major**), 104.0 (C, **major**), 101.9 (C, **minor**), 89.2 (CH, **major**), 85.5 (CH, **minor**), 81.3 (C, **minor**), 79.4 (C, **major**), 77.8 (CH, **minor**), 75.3 (CH, **major**), 69.5 (CH<sub>2</sub>, **minor**), 68.6 (CH<sub>2</sub>, **major**), 30.5 (C), 27.0 (CH<sub>3</sub>, **major**), 26.7 (CH<sub>3</sub>, **major**), 26.6 (CH<sub>3</sub>, **minor**), 26.2 (CH<sub>3</sub>, **minor**), 0.1 (3 x CH<sub>3</sub>, **minor**), 0.0 (3 x CH<sub>3</sub>, **major**); *m/z* 248 (M+H<sup>+</sup>, 41%), 233 (100%), 218 (18%); HRMS (M+H)<sup>+</sup> calcd. for C<sub>14</sub>H<sub>20</sub>O<sub>2</sub>Si 248.1232, found *m/z* 248.1230.

**[3-(2,2-Dimethyl-[1,3]dioxolane-4-yl)-7,7-dimethoxy-hept-3-ene-1,5-diynyl]-trimethylsilane (4):** To a solution of **2** (100 mg, 0.4 mmol) in trimethylorthoformate (5.5 mL, 49.6 mmol) was added zinc chloride (51 mg, 0.4 mmol). The reaction was allowed to warm to 140 °C in a Dean-Stark apparatus. The reaction mixture was then filtered through celite and washed with EtOAc (3 x 5 mL) and the filtrate concentrated *in vacuo*. Flash chromatography eluting with Et<sub>2</sub>O (5%)/PE gave the en diyne **4** (29.5 mg, 25%) as a yellow oil.  $\nu_{\max}$  (film)/cm<sup>-1</sup> 3054, 2305, 1265; <sup>1</sup>H NMR (300 MHz, CDCl<sub>3</sub>)  $\delta_{\text{H}}$  5.88 (s, 1H), 5.12 (s, 1H), 4.36 (t, 1H, *J* 7.0), 3.99 (dd, 1H, *J* 8.0, 7.0), 3.69 (dd, 1H, *J* 8.0, 7.0), 3.21 (s, 6H), 1.24 (s, 3H), 1.20 (s, 3H), 0.00 (s, 9H); <sup>13</sup>C (75MHz, CDCl<sub>3</sub>)  $\delta_{\text{C}}$  135.4 (C), 114.9 (CH), 110.8 (C), 105.0 (C), 100.4 (C), 93.8 (CH), 90.8 (C), 83.3 (C), 76.9 (CH), 69.3 (CH<sub>2</sub>), 52.9 (2 x CH<sub>3</sub>), 26.5 (CH<sub>3</sub>), 26.2 (CH<sub>3</sub>), 0.0 (3 x CH<sub>3</sub>); *m/z* 322 (M+H<sup>+</sup>, 11%), 307, 291, 264, 249, 233; HRMS (M+H)<sup>+</sup> calcd. for C<sub>17</sub>H<sub>26</sub>O<sub>4</sub>Si 322.1600, found *m/z* 322.1620.

**7-<sup>4</sup>Butyldimethylsilyloxy-3,5-heptadiyne-1,2-diol (6):** To **5** (0.320 g, 1.51 mmol) in pyrrolidine (1.5 mL) at 0 °C was added <sup>4</sup>butyldimethylsilylpropargyl alcohol (0.462 g, 2.72 mmol) and CuI (0.029 g, 0.15 mmol). The reaction mixture was stirred for 1 h and quenched with a saturated aqueous solution of NH<sub>4</sub>Cl (5 mL). The mixture was extracted with Et<sub>2</sub>O (3 x 5 mL), washed with brine (5 mL), dried over magnesium sulfate, filtered and concentrated *in vacuo*. Flash column chromatography eluting with EtOAc (20%)/PE gave **6** (0.299 g, 78%) as a brown oil.  $\nu_{\max}$  (film)/cm<sup>-1</sup> 3367, 2955, 2930, 2885, 2858, 2146, 1087; <sup>1</sup>H NMR (300 MHz, CDCl<sub>3</sub>)  $\delta_{\text{H}}$  4.40 (1H, t, *J* 4.6), 4.26 (2H, s), 3.66-3.56 (2H, m), 2.26 (1H, s br), 1.95 (1H, s br), 0.78 (9H, s), 0.00 (6H, s); <sup>13</sup>C (75MHz, CDCl<sub>3</sub>)  $\delta_{\text{C}}$  79.1 (C), 76.7 (C), 70.8 (C), 68.9 (C), 66.6 (CH<sub>2</sub>), 64.0 (CH), 52.4 (CH<sub>2</sub>), 26.1 (3 x CH<sub>3</sub>), 18.7 (C), -4.8 (2 x CH<sub>3</sub>); MS (EI) 254, 223, 179, 167, 149.

**7-<sup>4</sup>Butyldiphenylsilyloxy-3,5-heptadiyne-1,2-diol (7):** To **5** (0.113 g, 0.53 mmol) in pyrrolidine (1.5 mL) at 0 °C was added <sup>4</sup>butyldiphenylsilylpropargyl alcohol (0.155 g, 0.53 mmol) and CuI (0.010 g, 0.05 mmol). The reaction mixture was stirred for 1 h and quenched with a saturated aqueous solution of NH<sub>4</sub>Cl (5 mL). The mixture was extracted with Et<sub>2</sub>O (3 x 5 mL), washed with brine (5 mL), dried over magnesium sulphate, filtered and concentrated *in vacuo*. Flash column chromatography eluting with EtOAc (30%)/PE gave **7** (0.108 g, 54%) as an orange oil.  $\nu_{\max}$  (film)/cm<sup>-1</sup> 3427, 2103; <sup>1</sup>H NMR (300 MHz, CDCl<sub>3</sub>)  $\delta_{\text{H}}$  7.62-7.58 (4H, m), 7.38-7.28 (6H, m), 4.42-4.39 (1H, m), 4.31-4.29 (3H, m), 3.70-3.58 (2H, m), 3.28 (1H, s br), 2.87 (1H, s br), 0.77 (9H, s); <sup>13</sup>C (75MHz, CDCl<sub>3</sub>)  $\delta_{\text{C}}$  136 (4 x CH), 133.0 (C), 130.4 (2 x CH), 128.2 (4 x CH), 78.6 (C), 76.9 (C), 70.8 (C), 69.2 (C), 66.6 (CH<sub>2</sub>), 64.0 (CH), 53.4 (CH<sub>2</sub>), 27.0 (3 x CH<sub>3</sub>), 19.6 (C); M/S (EI) 377, 303, 273, 199, 181, 137, 77; HRMS (M+NH<sub>4</sub><sup>+</sup>) calcd for C<sub>23</sub>H<sub>26</sub>O<sub>3</sub>Si 396.1995, found *m/z* 396.1995.

**7-<sup>4</sup>Benzoyloxy-3,5-heptadiyne-1,2-diol (8):** To **5** (0.153 g, 0.72 mmol) in pyrrolidine (1.5 mL) at 0 °C was added <sup>4</sup>benzylpropargyl alcohol (0.117 g, 0.80 mmol) and CuI (0.015 g, 0.08 mmol) and the reaction was stirred for 6 h. The mixture was diluted with EtOAc (3 mL) and washed with a 10% aqueous solution of CuSO<sub>4</sub> (2 mL). The aqueous layer was extracted with EtOAc (3 x 3 mL) and the combined organic extracts was washed with brine (5 mL), dried over magnesium sulfate, filtered and concentrated *in vacuo*. Flash column chromatography eluting with EtOAc (10%)/PE gave **8** (0.041 g, 25%) as an orange oil.  $\nu_{\max}$  (film)/cm<sup>-1</sup> 3416, 3055, 2915, 2885, 2858, 2170; <sup>1</sup>H NMR (300 MHz, CDCl<sub>3</sub>)  $\delta_{\text{H}}$  7.30-7.25 (5H, m), 4.53 (2H, s), 4.46 (1H, dd, *J* 4.1), 4.17 (2H, s), 3.70-3.64 (2H, m), 2.30 (1H, s br), 1.72 (1H, s br); <sup>13</sup>C (75MHz, CDCl<sub>3</sub>)  $\delta_{\text{C}}$  136.9 (C), 128.5 (2 x CH), 128.16 (2 x CH), 128.11 (CH),

76.6 (C), 76.3 (C), 71.8 (CH<sub>2</sub>), 70.3 (C), 70.1 (C), 66.1 (CH<sub>2</sub>), 63.6 (CH), 57.4 (CH<sub>2</sub>), 26.1 (3 x CH<sub>3</sub>), 18.7 (C), -4.8 (2 x CH<sub>3</sub>); MS (EI) 182, 169, 141, 91.

**4-<sup>1</sup>Butyldimethylsilyloxy-but-3-yn-dimethylphosphonate (11):** To **10** (0.565 g, 2.15 mmol) was added trimethylphosphite (2 mL) and the reaction was heated at 140 °C for 1 h and excess of trimethylphosphite was removed by distillation. Flash column chromatography eluting with EtOAc (25%)/PE afforded **11** (0.354 g, 59%) as colourless oil.  $v_{\max}$  (film)/cm<sup>-1</sup> 3054, 2987, 2305, 1421; <sup>1</sup>H NMR (300 MHz, CDCl<sub>3</sub>)  $\delta_{\text{H}}$  4.20 (2H, dt,  $J_{\text{P-H}}$  5.3,  $J_{\text{H-H}}$  2.3), 3.72 (6H, d,  $J_{\text{P-H}}$  7.9), 2.70 (2H, dt,  $J_{\text{P-H}}$  21.9,  $J_{\text{H-H}}$  2.3), 0.79 (9H, s), 0.00 (6H, s); <sup>13</sup>C (75MHz, CDCl<sub>3</sub>)  $\delta_{\text{C}}$  81.8 (d,  $J$  10.3, C), 74.6 (d,  $J$  14.9, C), 53.9 (CH<sub>3</sub>), 53.8 (CH<sub>3</sub>), 52.2 (d,  $J$  2.9, CH<sub>3</sub>), 26.1 (3 x CH<sub>3</sub>), 18.6 (C), 17.5 (d,  $J$  146.6, CH<sub>2</sub>), -4.9 (2 x CH<sub>3</sub>); MS (EI) 277, 261, 247, 235, 205, 149, 137, 93, 79, 52; HRMS (M+NH<sub>4</sub><sup>+</sup>) calcd for C<sub>12</sub>H<sub>25</sub>O<sub>4</sub>SiP 310.1604, found  $m/z$  310.1600.

**1-Bromo-2-trimethylsilylethynyl-3,4-isopropylidenedioxy-but-1-ene(14):**

To bromomethyltriphenylphosphonium bromide (0.545 g, 1.25 mmol) in THF (10 mL) at -78 °C was added 0.5 M solution of KHMDS in toluene (2.5 mL, 1.25 mmol) and the reaction was stirred for 1 h. **12** (0.285 g, 1.25 mmol) in THF (5 mL) was added and the mixture was stirred for 5 min and quenched with a saturated aqueous solution of NH<sub>4</sub>Cl (5 mL). The mixture was extracted with Et<sub>2</sub>O (2 x 5 mL), washed with brine (5 mL), dried over magnesium sulphate, filtered and concentrated *in vacuo*. Flash column chromatography eluting with Et<sub>2</sub>O (1%)/PE gave **14** (0.270 g, 71%) as an orange oil.  $v_{\max}$  (film)/cm<sup>-1</sup> 3436, 2685, 1606; ; <sup>1</sup>H NMR (300 MHz, CDCl<sub>3</sub>)  $\delta_{\text{H}}$  6.57 (1H, s), 4.85 (1H, dd,  $J$  7.3, 6.4), 4.00 (1H, dd,  $J$  8.3, 6.4), 3.69 (1H, dd,  $J$  8.3, 7.3), 1.30 (3H, s), 1.24 (3H, s), 0.00 (9H, s); <sup>13</sup>C (75MHz, CDCl<sub>3</sub>)  $\delta_{\text{C}}$  128.4 (C), 118.0 (CH), 110.7 (C), 100.2 (C), 99.1 (C), 74.8 (CH), 68.0 (CH<sub>2</sub>), 26.6 (CH<sub>3</sub>), 26.5 (CH<sub>3</sub>), 0.0 (3 x CH<sub>3</sub>); MS (EI) 304, 302, 289, 287, 231, 229, 193, 139, 137, 135, 107, 73, 72; HRMS (M-H) calcd for C<sub>12</sub>H<sub>19</sub>O<sub>2</sub>Si 302.0338, found  $m/z$  302.0336.

**1-<sup>1</sup>Butyldimethylsilyloxy-5-trimethylsilylethynyl-6,7-isopropylidenedioxy-hept-4-en-2-yne (15):** To **14** (120 mg, 0.40 mmol) in THF (3 mL) was added Pd(dba)<sub>2</sub> (9 mg, 0.02 mmol), PPh<sub>3</sub> (11 mg, 0.004 mmol) and CuI (8 mg, 0.04 mmol) and the reaction was stirred for 15 min. Et<sub>3</sub>N (0.115 mL, 0.80 mmol) and <sup>1</sup>butyldimethylsilylpropargyl alcohol (82 mg, 0.48 mmol) in THF (2 mL) were added and the reaction was refluxed for 1 h and quenched with a saturated aqueous solution of NH<sub>4</sub>Cl (3 mL). The Mixture was extracted with Et<sub>2</sub>O (3 x 5 mL), washed with brine (5 mL), dried over magnesium sulfate, filtered and concentrated *in vacuo*. Flash column chromatography eluting with Et<sub>2</sub>O (2%)/PE gave **15** (81 mg, 54%) as a brown oil.  $v_{\max}$  (film)/cm<sup>-1</sup> 3436, 1638, 1421; <sup>1</sup>H NMR (300 MHz, CDCl<sub>3</sub>)  $\delta_{\text{H}}$  5.83 (1H, t,  $J$  2.0), 4.91 (1H, dd,  $J$  7.7, 6.5), 4.31 (2H, d,  $J$  2.0), 3.96 (1H, dd,  $J$  8.3, 6.5), 3.67 (1H, dd,  $J$  7.7, 8.3), 1.29 (3H, s), 1.23 (3H, s), 0.71 (9H, s), 0.00 (9H, s), -0.07 (6H, s); <sup>13</sup>C (75MHz, CDCl<sub>3</sub>)  $\delta_{\text{C}}$  133.7 (C), 119.0 (CH), 110.4 (C), 102.1 (C), 101.3 (C), 99.7 (C), 80.5 (C), 74.8 (CH), 68.3 (CH<sub>2</sub>), 52.6 (CH<sub>2</sub>), 26.6 (CH<sub>3</sub>), 26.5 (CH<sub>3</sub>), 26.0 (3 x CH<sub>3</sub>), 18.5 (C), 0.0 (2 x CH<sub>3</sub>), -4.9 (3 x CH<sub>3</sub>); MS (EI) 377, 277, 247, 203, 147, 120, 84, 73, 49; HRMS (M+NH<sub>4</sub><sup>+</sup>) calcd. for C<sub>21</sub>H<sub>36</sub>O<sub>2</sub>Si<sub>2</sub> 410.2547, found  $m/z$  410.2553.

**4-(2,2-Dibromo-vinyl)-2,2-dimethyl-[1,3]-dioxolane<sup>18</sup> (18):** To a solution of 1,2-5,6-diisopropylidene-D-mannitol **17** (25 g, 95 mmol) in DCM (350 mL) and aqueous sodium bicarbonate (4mL) was added portionwise sodium periodate (41 g, 190 mmol) over 20 min. Then the reaction mixture was stirred for 2 h and filtered through a pad of magnesium sulfate. DCM was then evaporated under vacuum to give the D-glyceraldehyde acetonide. Meanwhile, to a solution of carbon tetrabromide (25.50 g, 77 mmol) in DCM (100 mL) at 0 °C, was added triphenylphosphine (40.3 g, 154 mmol). The reaction mixture was stirred for 30 min and a solution of the D-glyceraldehyde acetonide (24.7 g, 190 mmol) in DCM (250 mL) was added over a period of 30 min. Stirring was continued for 1 h and the suspension was then poured into PE (2 L) giving a precipitation of an orange/brown semi-crystalline mass. The supernatant liquid was decanted, and the resulting solid was washed with Et<sub>2</sub>O (100 mL) and PE (100 mL). The filtrate was concentrated *in vacuo* to give an oil contaminated with triphenylphosphine oxide. Column chromatography eluting with Et<sub>2</sub>O 5%/PE gave the vinyl dibromide **18** (7.09 g, 75%) as a yellow oil. <sup>1</sup>H NMR (300 MHz, CDCl<sub>3</sub>)  $\delta_{\text{H}}$  6.53 (d, 1H,  $J$  7.6), 4.72 (t, 1H,  $J$  6.5), 4.18 (dd, 1H,  $J$  8.4, 6.3), 3.68 (dd, 1H,  $J$  8.4, 6.5), 1.42 (s, 3H), 1.38 (s, 3H); <sup>13</sup>C (75MHz, CDCl<sub>3</sub>)  $\delta_{\text{C}}$  137 (CH), 110.0 (C), 92.6 (C), 76.1 (CH), 68.0 (CH<sub>2</sub>), 26.6 (CH<sub>3</sub>), 25.6 (CH<sub>3</sub>); HRMS (M+H)<sup>+</sup> calcd. for C<sub>7</sub>H<sub>10</sub>O<sub>2</sub>Br<sub>2</sub>Si 284.9125, found  $m/z$  284.9124.

**(2,2-Dimethyl-[1,3]dioxolan-4-yl)-propynoic acid methyl ester<sup>18</sup> (19):** To a solution of dibromide **18** (10.0 g, 35.0 mmol) in THF (170 mL) at -78 °C was added *n*-BuLi (32.0 mL of a 2.3 M solution in hexanes, 73.4 mmol) over 30 min. The stirring was continued for 2 h and then methyl chloroformate (5.4 mL, 69.9 mmol) was added slowly. After stirring for 30 min, the reaction was warmed to rt and quenched by the addition of a saturated solution of NaHCO<sub>3</sub>. The mixture was extracted with Et<sub>2</sub>O (3 x 150 mL), the organics combined and washed with brine (75 mL), dried over magnesium sulphate and then concentrated *in vacuo*. Column chromatography eluting with Et<sub>2</sub>O (10%)/PE gave the titled compound **19** (5.1 g, 79%) as a colourless oil. <sup>1</sup>H NMR (300 MHz, CDCl<sub>3</sub>)  $\delta_{\text{H}}$  4.80 (1H, dd,  $J$  6.5, 5.5), 4.18 (1H, dd,  $J$  8.3, 6.5), 4.02 (1H, dd,  $J$  8.3, 5.5), 3.77 (3H, s), 1.48 (3H, s), 1.37 (3H, s);

$^{13}\text{C}$  (75MHz,  $\text{CDCl}_3$ )  $\delta_{\text{C}}$  153.4 (C=O), 111.2 (C), 84.8 (C), 76.7 (C), 69.2 ( $\text{CH}_2$ ), 64.9 (CH), 52.8 ( $\text{CH}_3$ ), 26.0 ( $\text{CH}_3$ ), 25.7 ( $\text{CH}_3$ );  $m/z$  185 ( $\text{M}+\text{H}^+$ , 7%), 157, 137, 129, 111, 97, 83, 69, 61.

**3-(2,2-Dimethyl-[1,3]dioxolan-4-yl)-3-iodo-acrylic acid methyl ester (20):** A solution **19** (1.00 g, 5.4 mmol), sodium iodide (1.22 g, 8.1 mmol) and acetic acid (3.0 mL, 50.1 mmol) in acetonitrile (120 mL) was heated at 115 °C. The stirring was continued for 90 min at this temperature. The reaction mixture was carefully poured into a saturated solution of  $\text{NaHCO}_3$  (50 mL) and ether (150 mL). The resulting suspension was extracted with  $\text{Et}_2\text{O}$  (3 x 100 mL), washed with a saturated solution of  $\text{NaHCO}_3$  (50 mL) and brine (50 mL), dried over magnesium sulphate and concentrated *in vacuo*. Column chromatography eluting with  $\text{Et}_2\text{O}$  (10%)/PE gave the vinyl iodide **20** (1.23 g, 95%) as a yellow oil;  $[\alpha]_{\text{D}}^{22} +40.1$  (*c* 1.01 in  $\text{CHCl}_3$ );  $\nu_{\text{max}}$  (film)/ $\text{cm}^{-1}$  2988, 2950, 2880, 1732, 1630;  $^1\text{H}$  NMR (300 MHz,  $\text{CDCl}_3$ )  $\delta_{\text{H}}$  6.87 (d, 1H, *J* 1.6), 4.74 (t, 1H, *J* 6.8), 4.34 (dd, 1H, *J* 8.6, 6.8), 3.81 (dd, 1H, *J* 8.6, 6.8), 3.76 (s, 3H), 1.47 (s, 3H), 1.40 (s, 3H);  $^{13}\text{C}$  (75MHz,  $\text{CDCl}_3$ )  $\delta_{\text{C}}$  164.8 (C=O), 123.2 (CH), 118.5 (C), 111.7 (C), 82.9 (CH), 69.9 ( $\text{CH}_2$ ), 51.7 ( $\text{CH}_3$ ), 26.0 ( $\text{CH}_3$ ), 25.8 ( $\text{CH}_3$ ); HRMS ( $\text{M}+\text{H}^+$ ) cald. for  $\text{C}_9\text{H}_{13}\text{O}_4\text{I}$  312.99368, found  $m/z$  312.99371; Anal. Calcd for  $\text{CHIO}$ : C, 34.64; H, 4.20. Found: C, 34.37; H, 4.21.

**3-(2,2-Dimethyl-[1,3]dioxolan-4-yl)-5-trimethylsilylanyl-pent-2-en-4-ynoic acid methyl ester<sup>9e,17</sup> (21):** A degassed solution of **20** (3.0 g, 9.60 mmol), triethylamine (4.0 mL, 28.80 mmol) and trimethylsilylacetylene (1.9 mL, 13.50 mmol) in acetonitrile (75 mL) was added to a suspension of  $\text{CuI}$  (183 mg, 0.96 mmol) and  $\text{Pd}(\text{PPh}_3)_4$  (555 mg, 0.48 mmol) in acetonitrile (10 mL) at rt. The reaction was continued for 2 h and a mixture of saturated solution of  $\text{NH}_4\text{Cl}$  (20 mL) and  $\text{Et}_2\text{O}$  (100 mL) was added. The reaction mixture was extracted with  $\text{Et}_2\text{O}$  (3 x 100 mL), washed with brine (50 mL), dried over magnesium sulphate and concentrated *in vacuo*. Column chromatography eluting with  $\text{Et}_2\text{O}$  (10%)/PE gave the titled compound **21** (2.5 g, 91%) as a yellow oil.  $[\alpha]_{\text{D}}^{22} +32.6$  (*c* 1.01 in  $\text{CHCl}_3$ ) (Lit.<sup>30</sup>  $[\alpha]_{\text{D}}^{25} 39.6$  (*c* 1.01 in  $\text{CHCl}_3$ ));  $^1\text{H}$  NMR (300 MHz,  $\text{CDCl}_3$ )  $\delta_{\text{H}}$  6.37 (d, 1H, *J* 1.5), 4.61 (dt, 1H, *J* 6.8, 1.5), 4.25 (dd, 1H, *J* 8.5, 6.8), 3.92 (dd, 1H, *J* 8.5, 6.8), 3.74 (s, 3H), 1.45 (s, 3H), 1.41 (s, 3H), 0.23 (s, 9H);  $^{13}\text{C}$  (75MHz,  $\text{CDCl}_3$ )  $\delta_{\text{C}}$  (ppm) 165.2 (C=O), 136.9 (CH), 123.7 (C), 110.9 (C), 109.0 (C), 99.4 (C), 77.7 (CH), 69.1 ( $\text{CH}_2$ ), 51.4 ( $\text{CH}_3$ ), 26.2 ( $\text{CH}_3$ ), 25.8 ( $\text{CH}_3$ ), -0.4 (3 x  $\text{CH}_3$ ); HRMS ( $\text{M}+\text{H}^+$ ) cald. for  $\text{C}_{14}\text{H}_{22}\text{O}_4\text{Si}$  283.13656, found  $m/z$  283.13657

**3-(2,2-Dimethyl-[1,3]dioxolan-4-yl)-5-trimethylsilylanyl-pent-2-en-4-yn-1-ol<sup>9e,17</sup> (22):** To a solution of **21** (2.5 g, 8.7 mmol) in THF (35 mL) at -78 °C was added DIBAL (21.8 mL of a 1 M solution in toluene, 21.8 mmol) dropwise. The stirring was continued for 3 h until completion and then saturated Rochelle salt solution (10 mL) was added. The reaction mixture was extracted with  $\text{Et}_2\text{O}$  (2 x 30 mL), washed with brine (2 x 10 mL), dried over magnesium sulfate, filtered and concentrated *in vacuo*. Flash chromatography eluting with  $\text{Et}_2\text{O}$  (40%)/PE gave the allylic alcohol **22** (2.2 g, 98%) as a yellow oil.  $[\alpha]_{\text{D}}^{22} +29.6$  (*c* 2.07 in  $\text{CHCl}_3$ );  $^1\text{H}$  NMR (300 MHz,  $\text{CDCl}_3$ )  $\delta_{\text{H}}$  6.25 (t, 1H, *J* 6.4), 4.49 (t, 1H, *J* 6.8), 4.40 (d, 2H, *J* 6.4), 4.14 (dd, 1H, *J* 8.3, 6.8), (dd, 1H, *J* 8.3, 6.8), 1.62 (s br, 1H), 1.46 (s, 3H), 1.40 (s, 3H), 0.20 (s, 9H,  $\text{CH}_3$ );  $^{13}\text{C}$  (75MHz,  $\text{CDCl}_3$ )  $\delta_{\text{C}}$  138.8 (CH), 123.7 (C), 110.2 (C), 103.0 (C), 99.2 (C), 78.0 (CH), 68.9 ( $\text{CH}_2$ ), 61.3 ( $\text{CH}_2$ ), 26.5 ( $\text{CH}_3$ ), 26.2 ( $\text{CH}_3$ ), 0.00 (3 x  $\text{CH}_3$ ); HRMS ( $\text{M}+\text{H}^+$ ) cald. for  $\text{C}_{13}\text{H}_{23}\text{O}_3\text{Si}$  183.14165, found  $m/z$  183.14159.

**3-(2,2-Dimethyl-[1,3]dioxolan-4-yl)-pent-2-en-4-yn-1-ol (24):** To a solution of **22** (200 mg, 0.8 mmol) in dry THF (5 mL) was added tetrabutylammonium fluoride (1.6 ml of a 1 M solution in THF, 1.6 mmol) and the reaction stirred for 20 min at 0 °C. The reaction was poured into  $\text{H}_2\text{O}$  (2 mL). The mixture was extracted with  $\text{Et}_2\text{O}$  (3 x 15 mL) and the combined organics washed with brine (5 mL), dried over magnesium sulfate and concentrated *in vacuo*. Column chromatography eluting with  $\text{Et}_2\text{O}$  50%/PE afforded **24** (122 mg, 85%) as a yellow oil.  $[\alpha]_{\text{D}}^{22} +17.1$  (*c* 1.04 in  $\text{CHCl}_3$ );  $\nu_{\text{max}}$  (film)/ $\text{cm}^{-1}$  3411, 3284, 2987, 2940, 2882, 2361, 1457;  $^1\text{H}$  NMR (300 MHz,  $\text{CDCl}_3$ )  $\delta_{\text{H}}$  6.33 (t, 1H, *J* 6.4), 4.53 (dd, 1H, *J* 7.1, 6.4), 4.42 (d, 2H, *J* 6.4), 4.17 (dd, 1H, *J* 8.3, 6.4), 3.90 (dd, 1H, *J* 8.3, 7.1), 3.23 (s, 1H), 1.67 (br s, 1H), 1.47 (s, 3H), 1.40 (s, 3H);  $^{13}\text{C}$  (75MHz,  $\text{CDCl}_3$ )  $\delta_{\text{C}}$  139.2 (CH), 122.6 (C), 110.2 (C), 84.8 (C), 78.1 (CH), 77.6 (CH), 68.7 ( $\text{CH}_2$ ), 60.9 ( $\text{CH}_2$ ), 26.3 ( $\text{CH}_3$ ), 25.9 ( $\text{CH}_3$ ); HRMS ( $\text{M}+\text{H}^+$ ) cald. for  $\text{C}_{10}\text{H}_{14}\text{O}_3$  183.10211, found  $m/z$  183.10223.

**[3-(2,2-Dimethyl-[1,3]dioxolan-4-yl)-3-ethynyl-oxiranyl]-methanol (25):** To a suspension of powdered molecular sieves 4Å (2.3 g) in DCM (6 mL) cooled at -25 °C was added Ti (IV) isopropoxide (1.13 ml, 3.78 mmol) and D-(-)-diethyl tartrate (0.650 ml, 3.78 mmol) and the reaction mixture was stirred for 30 min. A prepared solution of 5.2 M *tert*-butyl hydroperoxide (18 mL, 94.5 mmol) in DCM (12 mL) was added dropwise and the reaction was stirred for 10 min. **24** (3.447 g, 18.9 mmol) was then added dropwise and the reaction mixture was allowed to warm to -6 °C and stirred for 96 h. The reaction was quenched with saturated solution of sodium thiosulfate (50 mL) and diluted with  $\text{Et}_2\text{O}$  (50 mL). The resultant precipitate was filtered through celite and washed with  $\text{Et}_2\text{O}$ . The filtrate was extracted with  $\text{Et}_2\text{O}$ , washed with brine, dried over magnesium sulfate, filtered and concentrated *in vacuo*. Column chromatography eluting with  $\text{Et}_2\text{O}$  (40%)/PE gave **25** (3.2 g, 81%) as a colourless oil.  $[\alpha]_{\text{D}}^{22} +62.5$  (*c* 1.1 in  $\text{CHCl}_3$ ),  $\nu_{\text{max}}$  (film)/ $\text{cm}^{-1}$  3452, 3271, 2987, 2921, 2889, 2119, 1377;  $^1\text{H}$  NMR

(500 MHz, CDCl<sub>3</sub>) δ<sub>H</sub> 4.13 (dd, 1H, *J* 8.7, 6.3), 4.04 (dd, 1H, *J* 8.7, 6.3), 3.93 (t, 1H, *J* 6.3), 3.90 (dd, 1H, *J* 12.4, 4.4), 3.78 (dd, 1H, *J* 12.4, 6.2), 3.28 (dd, 1H, *J* 6.2, 4.4), 2.67 (br s, 1H), 2.45 (s, 1H), 1.42 (s, 3H), 1.31 (s, 3H); <sup>13</sup>C (125 MHz, CDCl<sub>3</sub>) δ<sub>C</sub> 110.8 (C), 77.2 (C), 76.6 (CH), 75.7 (CH), 66.6 (CH<sub>2</sub>), 61.7 (CH<sub>2</sub>), 61.2 (CH), 55.1 (C), 26.05 (CH<sub>3</sub>), 25.1 (CH<sub>3</sub>); HRMS (M+H)<sup>+</sup> calcd. for C<sub>10</sub>H<sub>14</sub>O<sub>4</sub> 199.09703, found *m/z* 199.09602; Anal calcd for CHO: C, 60.59; H, 7.12. Found: C, 60.70; H, 7.12.

**4-[3-(2,2-dibromo-vinyl)-2-ethynyl-oxiranyl]-2,2-dimethyl [1,3]dioxolane (27):** To **25** (0.50 g, 2.52 mmol) in DCM (13 mL) at 0 °C was added Dess-Martin periodinane (2.02 g, 5.04 mmol) in one portion. The stirring was continued at 0 °C for 30 min and the reaction mixture was poured into a mixture of a saturated aqueous solution of sodium thiosulfate (5 mL) and a saturated aqueous solution of NaHCO<sub>3</sub> (5 mL). Then Et<sub>2</sub>O (100 mL) was added and the mixture stirred for 30 min. The mixture was extracted with Et<sub>2</sub>O (3 x 50 mL), washed with brine (2 x 10 mL), dried over magnesium sulfate, filtered and concentrated *in vacuo*. The crude epoxy-aldehyde **26** was seen to be of sufficient purity (without flash chromatography) for use in the next stage.

To a solution of carbon tetrabromide (1.68 g, 5.04 mmol) in DCM (50 mL) was added triphenylphosphine (1.32 g, 5.04 mmol) and the reaction mixture was stirred for 15 min at -78 °C. A solution of the crude epoxy-aldehyde **26** and Et<sub>3</sub>N (0.53 mL, 3.78 mmol) in DCM (30 mL) was added dropwise *via* cannula. The stirring was continued for 10 min and the reaction quenched with a saturated aqueous solution of NaHCO<sub>3</sub>. The reaction mixture was extracted with DCM, washed with brine, dried over magnesium sulfate, filtered and concentrated *in vacuo*. The resulting crude product was transferred on silica gel previously neutralised with 0.2% of Et<sub>3</sub>N. Flash column chromatography eluting with Et<sub>2</sub>O 10%/PE gave the epoxy-dibromoalkene **27** (0.47 g, 53%) as a colourless oil. [α]<sub>D</sub><sup>22</sup> +94 (*c* 1.0 in CHCl<sub>3</sub>); ν<sub>max</sub> (cm<sup>-1</sup>) 3225, 2917, 2856, 2172, 1465; <sup>1</sup>H NMR (400 MHz, CDCl<sub>3</sub>) δ<sub>H</sub> 6.39 (d, 1H, *J* 7.9), 4.15 (dd, 1H, *J* 10.4, 9.2), 4.034 (dd, 1H, *J* 9.2, 5.7), 4.032 (dd, 1H, 10.4, 5.7), 3.78 (d, 1H, *J* 7.9), 2.50 (s, 1H), 1.42 (3H, s), 1.31 (s, 3H); <sup>13</sup>C NMR (100 MHz, CDCl<sub>3</sub>) δ<sub>C</sub> 132.4 (CH), 111.0 (Me<sub>2</sub>C), 96.7 (CBr<sub>2</sub>), 77.2 (C), 76.5 (C), 75.9 (CH), 66.8 (CH<sub>2</sub>), 60.2 (CH), 57.0 (C), 26.2 (CH<sub>3</sub>), 25.3 (CH<sub>3</sub>); HRMS (M+H)<sup>+</sup> calcd. for C<sub>11</sub>H<sub>12</sub>Br<sub>2</sub>O<sub>3</sub> 350.9231, found *m/z* 350.9230.

**(3-chloroprop-1-ynyl)trimethylsilane<sup>32</sup> (31):** To propargyl chloride **30** (5.0 mL, 69 mmol) in THF (200 mL) at -78 °C was added a 1.4 M solution of *n*-BuLi in hexane (25 mL, 35 mmol) dropwise over 2 h. TMSCl (8.8 mL, 69 mmol) was then added dropwise and the solution allowed to warm to rt and stirred for 1 h. The reaction mixture was quenched by adding it to H<sub>2</sub>O (200 mL), then Et<sub>2</sub>O (200 mL) was added and the layers separated. The aqueous layer was then washed with Et<sub>2</sub>O (2 x 200 mL) and the combined organic extracts washed with H<sub>2</sub>O (100 mL), brine (100 mL), and dried over magnesium sulfate. Concentration *in vacuo*, followed by purification *via* distillation (bp 135 °C) gave **31** (4.8 g, 48%) as a colourless oil. ν<sub>max</sub>(film)/cm<sup>-1</sup> 2962, 2183, 1269, 1029; <sup>1</sup>H NMR (300 MHz; CDCl<sub>3</sub>) δ<sub>H</sub> 4.13 (s, 2H), 0.18 (s, 9H); <sup>13</sup>C NMR (75 MHz; CDCl<sub>3</sub>) δ<sub>C</sub> 99.6 (C), 91.8 (C), 30.7 (CH<sub>2</sub>), -0.4 (3 x CH<sub>3</sub>).

**(3-chloroprop-1-ynyl)triethylsilane<sup>33</sup>:** To propargyl chloride **30** (2.5 mL, 34.6 mmol) in THF (100 mL) at -78 °C was added a 1.4 M solution of *n*-BuLi in hexane (12.5 mL, 17.5 mmol) dropwise over 2 h. TESCl (5.8 mL, 34.6 mmol) was then added dropwise and the solution allowed to warm to rt and stirred for 1 h. The reaction mixture was quenched by adding it to H<sub>2</sub>O (100 mL), then Et<sub>2</sub>O (100 mL) was added and the layers separated. The aqueous layer was then washed with Et<sub>2</sub>O (2 x 100 mL) and the combined organic extracts washed with H<sub>2</sub>O (50 mL), brine (50 mL), and dried over magnesium sulphate. Concentration *in vacuo* and subsequent column chromatography eluting with 100% PE gave the title compound (2.4 g, 37%) as a colourless oil. ν<sub>max</sub>(film)/cm<sup>-1</sup> 2959, 2179, 1029; <sup>1</sup>H NMR (300 MHz; CDCl<sub>3</sub>) δ<sub>H</sub> 4.15 (s, 2H, CH<sub>2</sub>), 0.99 (t, 9H, *J* 7.9), 0.61 (q, 6H, *J* 7.8); <sup>13</sup>C NMR (75 MHz; CDCl<sub>3</sub>) δ<sub>C</sub> 100.8 (C), 89.5 (C), 30.8 (CH<sub>2</sub>), 7.3 (3 x CH<sub>3</sub>), 4.1 (3 x CH<sub>2</sub>).

**tert-Butyl-(3-Chloro-prop-1-ynyl)-dimethylsilane:** To propargyl chloride **30** (5.0 mL, 69 mmol) in THF (200 mL) at -78 °C was added a 2.18 M solution of *n*-BuLi (16 mL, 35 mmol) dropwise over 2 h. A 2 M solution of TBSCl in THF (34.5 mL, 69 mmol) was then added dropwise *via* cannula and the reaction was allowed to warm to rt and stirred for 1 h. The reaction was quenched with H<sub>2</sub>O (200 mL), extracted with Et<sub>2</sub>O (2 x 200 mL), washed with brine (100 mL), dried over magnesium sulfate, filtered and concentrated *in vacuo*. Column chromatography eluting with 100% PE gave the title compound (5.5 g, 42%) as a colourless oil. ν<sub>max</sub> (cm<sup>-1</sup>) 2916, 2198 1450, 1257, 1033, 817; <sup>1</sup>H NMR (300 MHz; CDCl<sub>3</sub>) δ<sub>H</sub> (300 MHz, CDCl<sub>3</sub>) 4.14 (s, 2H), 0.94 (s, 9H), 0.13 (s, 6H); <sup>13</sup>C NMR (75 MHz; CDCl<sub>3</sub>) δ<sub>C</sub> 100.3 (C), 90.2 (C), 30.7 (CH<sub>2</sub>), 25.9 (C), 16.4 (3 x CH<sub>3</sub>), -4.8 (2 x CH<sub>3</sub>).

**4-Hydroxy-but-2-ynal diethyl acetal<sup>31</sup> (41):** To a solution of (propargyloxy)trimethylsilane (30.0 g, 234 mmol) in THF (150 mL) was added a 1 M THF-solution of ethylmagnesium bromide (234 mL, 234 mmol). The reaction was stirred for 30 min and a solution of phenyl orthoformate (41.8 g, 212 mmol) in THF (110 mL) was added. Stirring was continued for 16 h then the reaction quenched with a saturated solution of NH<sub>4</sub>Cl (200 mL) and H<sub>2</sub>O (200 mL), extracted with Et<sub>2</sub>O (2 x 200 mL), washed with NaOH (4 M solution, 3 x 100 mL) dried over

magnesium sulfate and concentrated *in vacuo*. The residue was then dissolved in methanol (530 mL) and potassium carbonate (29.3 g, 212 mmol) was added at 0 °C and the mixture stirred for 10 min. The solution was concentrated *in vacuo* then H<sub>2</sub>O (200 mL) was added. The mixture was extracted with EtOAc (3 x 150 mL), dried over magnesium sulfate and concentrated *in vacuo*. Distillation of the residue under vacuum (bp 88 °C; 1 mmHg) gave **41** (23.7 g, 70%) as a colourless oil.  $\nu_{\max}$  (cm<sup>-1</sup>) 3424, 1120; <sup>1</sup>H NMR (300 MHz, CDCl<sub>3</sub>)  $\delta_{\text{H}}$  5.26 (d, 1H, *J* 1.3), 4.28 (dd, 2H, *J* 6.2, 1.3), 3.70 (dq, 2H, *J* 7.2, 9.4), 3.55 (dq, 2H, *J* 7.2, 9.4), 2.30 (s br, 1H), 1.19 (t, 6H, *J* 7.2); <sup>13</sup>C NMR (300 MHz; CDCl<sub>3</sub>)  $\delta_{\text{C}}$  (75 MHz, CDCl<sub>3</sub>) 91.6 (CH), 84.2 (C), 81.1 (C), 61.3 (CH<sub>2</sub>), 51.1 (CH<sub>2</sub>), 15.4 (CH<sub>3</sub>).

**4-Chloro-1,1-diethoxy-but-2-yne<sup>34</sup> (42)**: To a solution of the alcohol **41** (10.0 g, 63 mmol) and triethylamine (26.4 mL, 190 mmol) in ether (320 mL) was added dropwise methanesulfonyl chloride (5.5 mL, 70 mmol) at 0 °C. Stirring was continued for 1 h and then the reaction quenched with a saturated aqueous solution of NaHCO<sub>3</sub> (120 mL), extracted with Et<sub>2</sub>O (2 x 60 mL), dried over magnesium sulfate, filtered and concentrated *in vacuo*. The residue was dissolved in chloroform (310 mL) with tetra-*n*-butylammonium chloride (41.0 g, 126 mmol). The reaction was refluxed for 1 h. Concentration of the mixture *in vacuo* gave the crude residue to which Et<sub>2</sub>O (200 mL) was added. The solution was washed with H<sub>2</sub>O (100 mL), then brine (2 x 100 mL), dried over magnesium sulfate and concentrated *in vacuo* to furnish the pure propargylic chloride **42** as a yellow oil (8.9 g, 80%).  $\nu_{\max}$  (cm<sup>-1</sup>) 2971, 2901, 2888, 2238; <sup>1</sup>H NMR (300 MHz, CDCl<sub>3</sub>)  $\delta_{\text{H}}$  5.23 (t, 1H, *J* 1.3), 4.13 (d, 2H, *J* 1.3), 3.69 (dq, 2H, *J* 7.2, 9.3), 3.53 (dq, 2H, *J* 7.2, 9.3), 1.18 (t, 6H, *J* 7.2); <sup>13</sup>C NMR (75 MHz, CDCl<sub>3</sub>)  $\delta_{\text{C}}$  91.1 (CH), 81.6 (C), 79.9 (C), 60.9 (2 x CH<sub>2</sub>), 29.7 (CH<sub>2</sub>), 14.9 (2 x CH<sub>3</sub>); HRMS (M+H)<sup>+</sup> calcd. for C<sub>8</sub>H<sub>13</sub>O<sub>2</sub>Cl 175.0520, found *m/z* 175.0518.

#### References in addition to those found in the paper;

- 32 Y. W. Li, T. J. Marks, *J. Am. Chem. Soc.* **1998**, *120*, 1757–1771.  
33 S. L. Castle, G. S. C. Srikanth, *Org. Lett.* **2003**, *5*, 3611–3614.  
34 R. Epsztajn, I. Marszak, *Bull. Soc. Chim. France* **1968**, 316.
